# Supplementary material for: Analyzing the Impact of a Practical Student Checklist on Addressing Misinformation in Anatomy and Related Fields in Dentistry
Source: Research Square preprint supplement (doi:10.21203/rs.3.rs-7492631/v1), 2025-10-22
Supplement: Supplementary file 1 [file bc1be6ca75e66abb12e72c30.docx]

After reading the complete news article, answer:

1. Have you heard of the website where the scientific information is available?
   Yes
   No
2. Does the scientific information contain clearly attributed source(s)?
   Yes
   No
3. Is the information being disseminated by other reputable media outlets?
   Yes
   No
4. Are spelling and grammar correctly applied in the text?
   Yes
   No
5. Does the information have a publication date?
   Yes
   No
6. Does the URL (Uniform Resource Locator) appear correct?
   Yes
   No
7. If there is an image accompanying the article or scientific report, is the image attributed to someone?
   Yes
   No
8. Is the author or "editorial group of media outlets and communication channels" clearly identified?
   Yes
   No
9. Is there contact information for the author?
   Yes
   No

1. Are the cited documents official or quotes from specific articles or reports on the subject to which they are attributed?
   Yes
   No
